# Supplementary material for: SOX9 Regulates Cancer Stem-Like Properties and Metastatic Potential of Single-Walled Carbon Nanotube-Exposed Cells
Source: PubMed Central journal article supplement (PMC5599589; doi:10.1038/s41598-017-12037-8), 2017-09-14

## Supplementary materials

### **SOX9 Regulates Cancer Stem-Like Properties and Metastatic Potential of Single-Walled Carbon Nanotube-Exposed Cells**

Maria A. Voronkova<sup>^</sup>, Sudjit Luanpitpong<sup>‡,§</sup>, Liying Wang Rojanasakul<sup>¶</sup>, Vincent Castranova<sup>‡</sup>, Cerasela Zoica Dinu<sup>||</sup>, Heimo Riedel<sup>#</sup>, and Yon Rojanasakul<sup>\*,^,‡</sup>

<sup>^</sup>West Virginia University Cancer Institute, <sup>‡</sup>Department of Pharmaceutical Sciences, <sup>||</sup>Department of Chemical Engineering, <sup>#</sup>Department of Biochemistry, West Virginia University, WV 26506, United States; <sup>§</sup>Siriraj Center of Excellence for Stem Cell Research, Faculty of Medicine Siriraj Hospital, Mahidol University, Bangkok 10700, Thailand; <sup>¶</sup>Allergy and Clinical Immunology Branch, National Institute for Occupational Safety and Health, Morgantown, WV 26505, United States.

#### **Corresponding Author**

\*Correspondence should be addressed to Yon Rojanasakul, West Virginia University, Morgantown, WV 26506, USA. Phone: +1 304 293 1476. Email: [yrojan@hsc.wvu.edu](mailto:yrojan@hsc.wvu.edu)

**Figure S1**

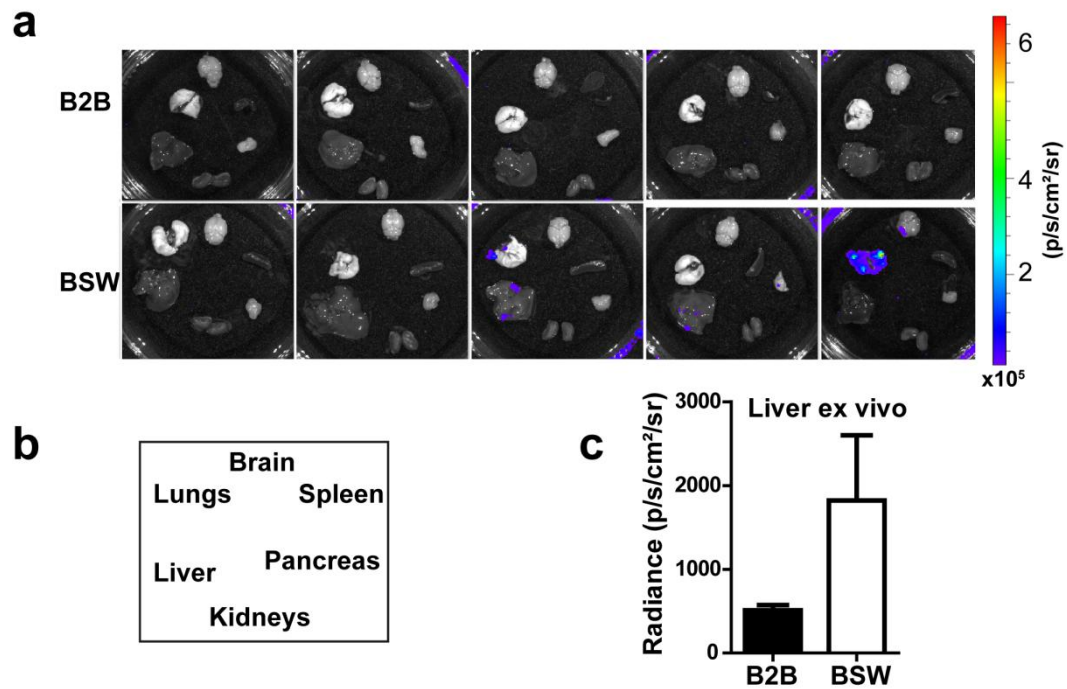

**Supplementary Figure 1. BSW cells spontaneously metastasize in the subcutaneous mouse xenograft.** Luciferase-labeled cells were injected subcutaneously into flanks of NOD/SCID gamma mice (n=5 per group). **(a)** *Ex vivo* bioluminescent signal from isolated mouse organs at the end of the experiment at week 4. **(b)** Schematic representation of organ positions in **a**. **(c)** *Ex vivo* signal from liver. Error bars are mean  $\pm$  SEM.

## Figure S2

**a**

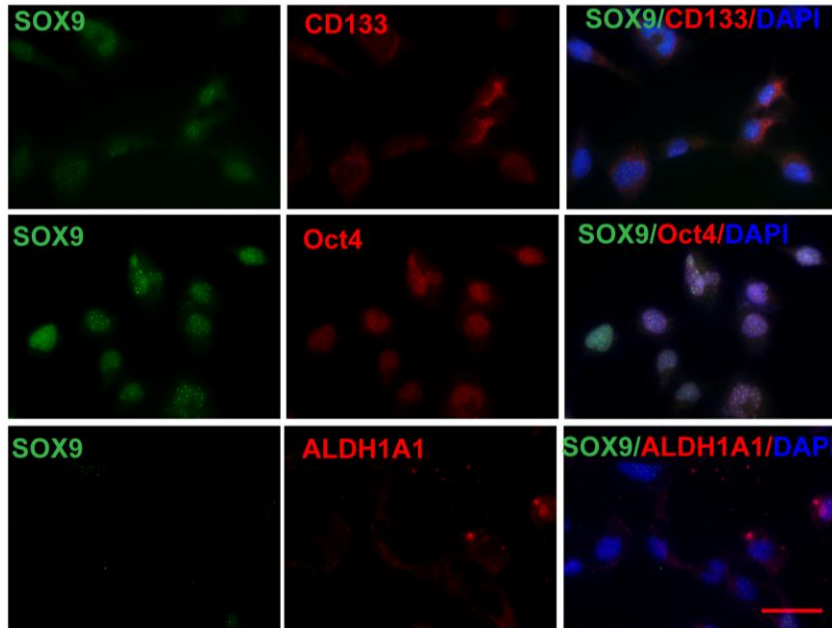

**b**

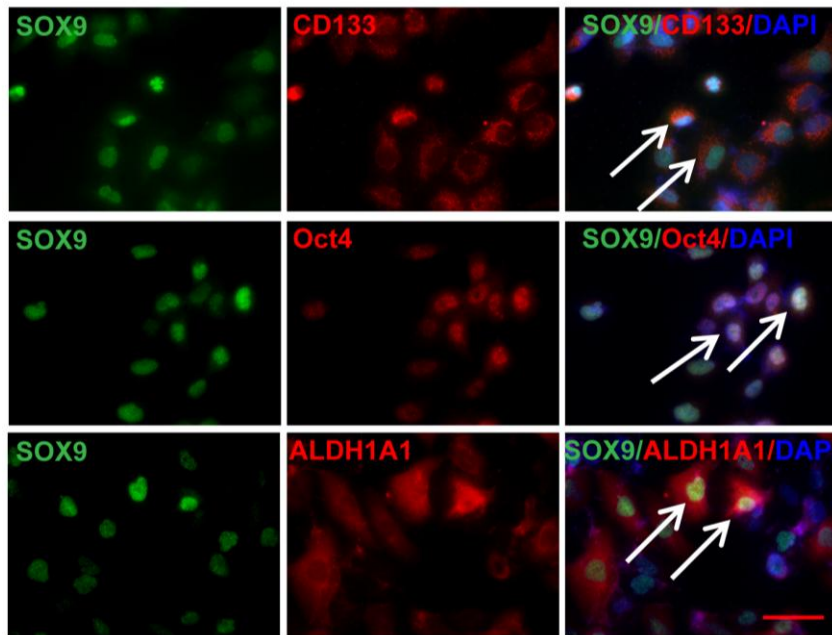

**Supplementary Figure 2. SOX9 colocalizes with CSC markers.** Immunofluorescence staining of CSC markers in SWCNT-treated and control cells. **(a)** Control Beas-2B cells, **(b)** BSW cells. Arrows specify cells expressing high levels of SOX9 and indicated CSC markers. Scale bar, 50  $\mu\text{m}$ .

### Figure S3

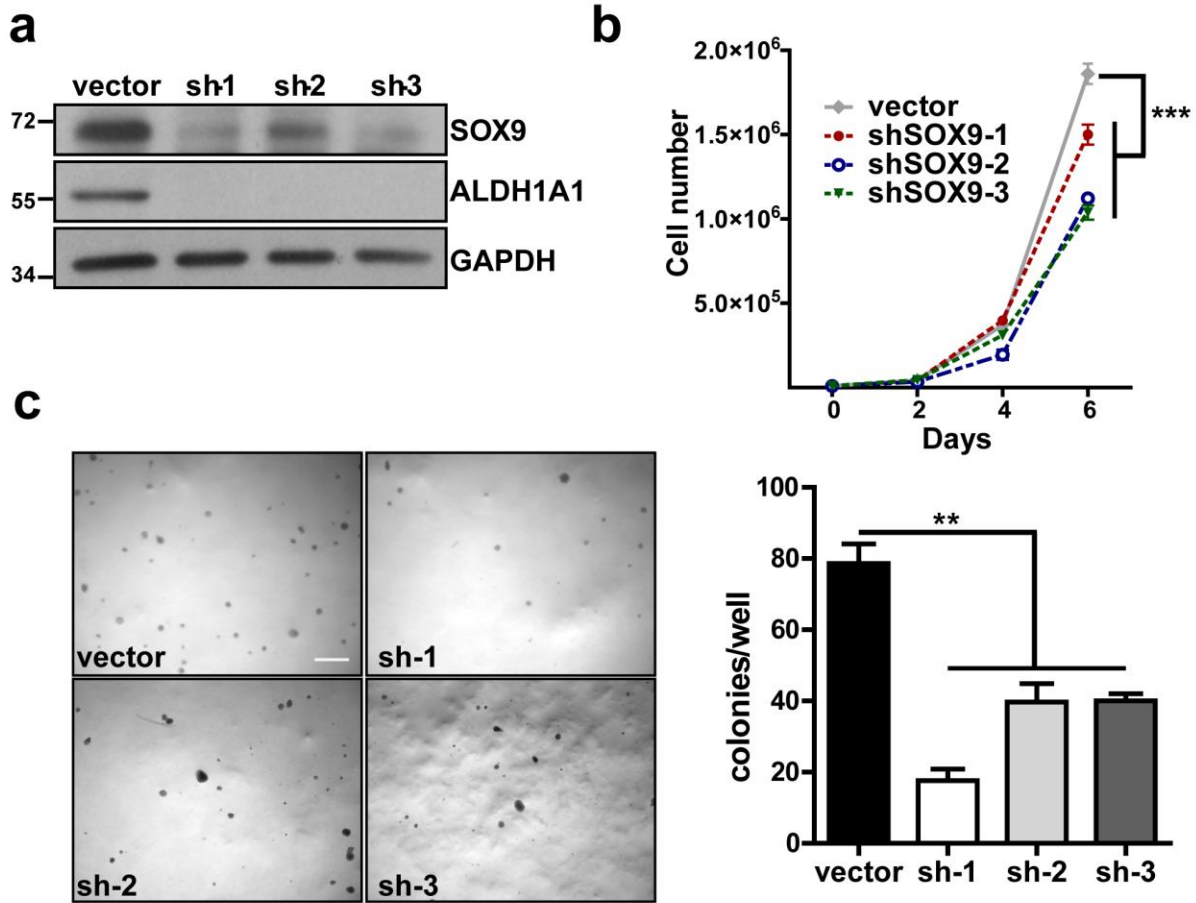

**Supplementary Figure 3. SOX9 knockdown in H460 cells.** (a) SOX9 knockdown by 3 shRNAs diminishes ALDH1A1 expression. (b) Cell proliferation assay,  $n = 2$ .  $P < 0.001$ , 2way repeated measures ANOVA followed by Bonferroni posttests, shRNAs vs vector control. (c) Soft agar colony formation.  $p < 0.05$ , Turkey post hoc analysis following ANOVA,  $n = 3$ . Scale bar, 2 mm.

**Supplementary Table 1. List of antibodies used in this study.**

| <b>Name</b>        | <b>Company</b>         | <b>Catalog No</b> | <b>Application</b> |
|--------------------|------------------------|-------------------|--------------------|
| SOX9               | EMD Millipore          | AB5535            | WB, IHC            |
| SOX9               | EMD Millipore          | MABC785           | IF                 |
| ALDH1A1            | Abcam                  | ab52492           | WB                 |
| ALDH1A1            | EMD Millipore          | MABN838           | WB                 |
| ALDH1A1            | Cell Signaling         | 54135             | IF                 |
| $\beta$ -actin     | Sigma-Aldrich          | A5441             | WB                 |
| GAPDH              | EMD Millipore          | CB1001            | WB                 |
| a-rabbit-HRP       | Jackson ImmunoResearch | 711-035-152       | WB                 |
| a-mouse-HRP        | Jackson ImmunoResearch | 715-035-151       | WB                 |
| Human mitochondria | EMD Millipore          | MAB1273           | IHC                |
| CD133              | Cell Signaling         | 86781             | IF                 |
| Oct4               | Abcam                  | ab19857           | IF                 |

WB – western blotting, IHC – immunohistochemistry, IF – immunofluorescence.

**Supplementary Table 2. Oligonucleotides for real-time quantitative PCR analysis.**

| <b>Name</b> | <b>Forward (5' to 3')</b> | <b>Reverse (5' to 3')</b> |
|-------------|---------------------------|---------------------------|
| ALDH1A1     | AGTGTGGGTGAATTGCTATGG     | TGTGACTGTTTTGACCTCTGT     |
| ALDH1A3     | CTTCTGCCTTAGAGTCTGGAAC    | TGCTACGTGGACAAGAAGCTG     |
| GAPDH       | CCCACTCCTCCACCTTTGAC      | ATGAGGTCCACCACCCTGTT      |
| CD133       | TGAATAGCAACCCTGAACTGAG    | TTGGCGTTGTACTCTGTCAG      |
| Oct4        | TCTTCAGGAGATATGCAAAGCAGA  | GATCTGCTGCAGTGTGGGT       |
| SOX2        | CACTGCCCTCTCACAC          | TCCATGCTGTTTCTTACTCTCC    |
| Nanog       | GAAATACCTCAGCCTCCAGC      | GCGTCACACCATTGCTATTC      |

Supplementary Figure 4. Full images of unedited western blots used in Figure 2a.

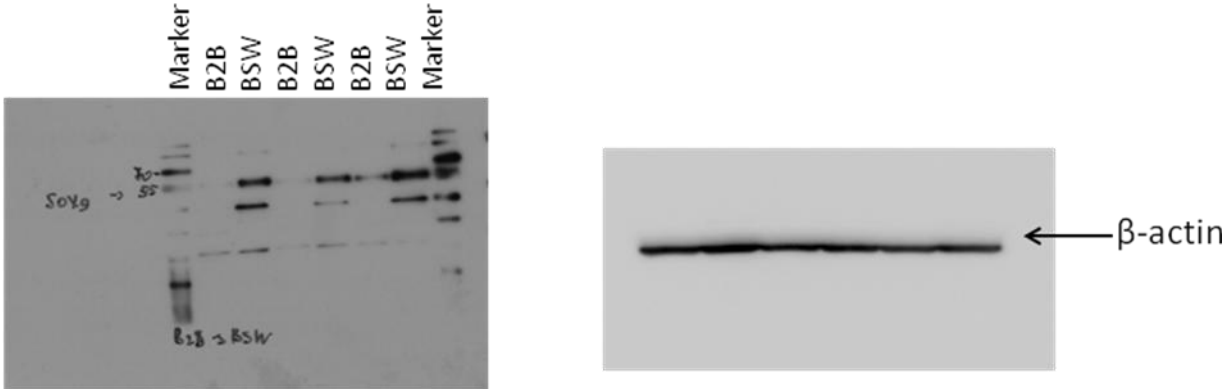

Same blot was reprobred with anti β-actin antibodies.

Supplementary Figure 5. Full images of unedited western blots used in Figure 3a.

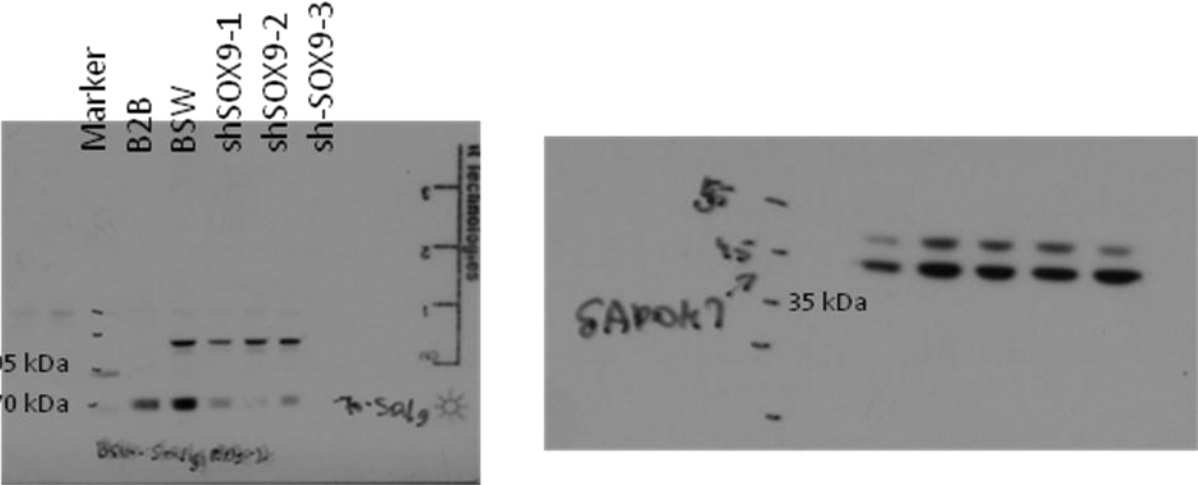

Same blot was reprobed with anti GAPDH antibodies.

Supplementary Figure 6. Full images of unedited western blots used in Figure 5d.

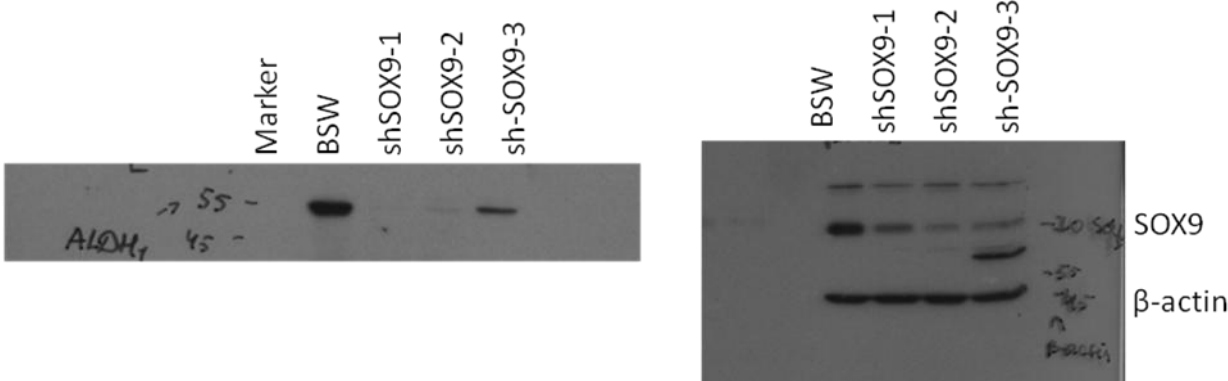



**Supplementary Figure 7. Full images of unedited western blots used in Figure 7a.**

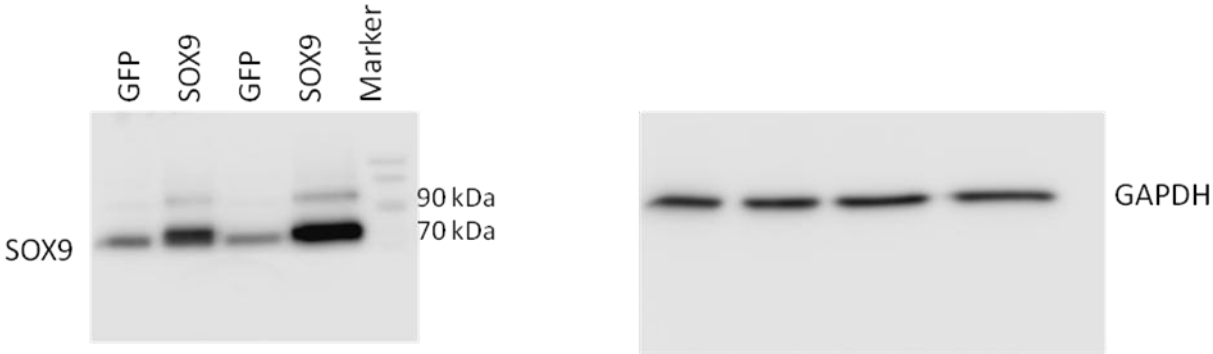

Same blot was reprobed with anti GAPDH antibodies.

Supplementary Figure 8. Full images of unedited western blots used in Figure S3.

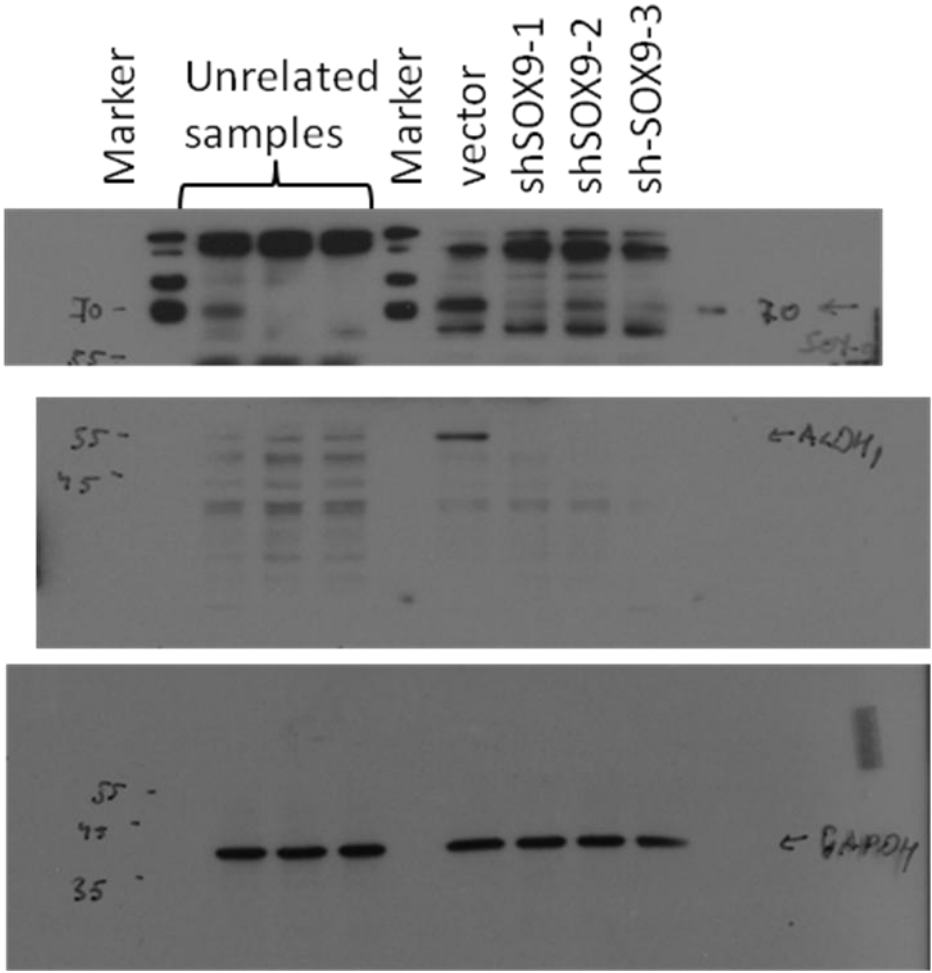

Supplement: 41598_2017_12037_MOESM1_ESM.pdf [file 41598_2017_12037_MOESM1_ESM.pdf]
